# Supplementary material for: Mendelian randomization study indicates lack of causal associations between iron status and lung cancer
Source: PubMed Central journal article supplement (PMC9302260; doi:10.1097/md.0000000000029879), 2022-07-22
Supplement: medi-101-e29879-s001.pdf [file medi-101-e29879-s001.pdf]

**Supplementary Figure 1.** Associations between genetically-predicted iron status and lung cancer risk using all SNPs in sensitivity analysis.

CI, indicates confidence interval; OR, odds ratio

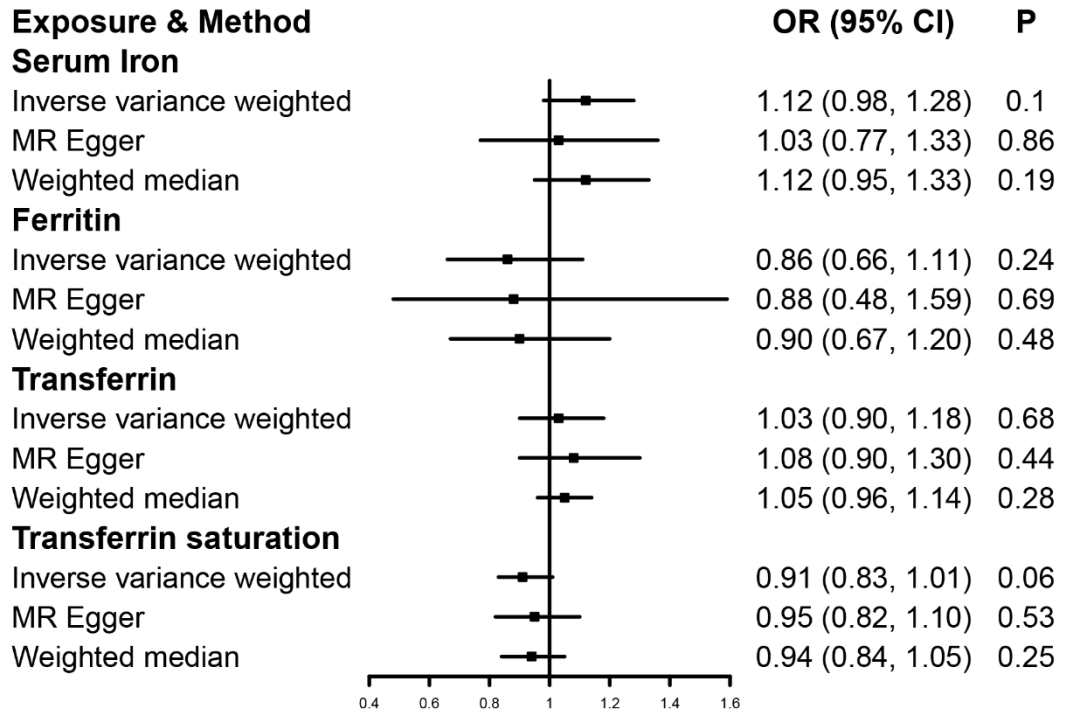



**Supplementary Table 1.** F statistics for SNPs associated with iron status obtained from the Genetics of Iron Status Consortium GWAS meta-analysis used in the mendelian randomization main analysis.

| SNPs      | Iron               |     | Transferrin Saturation |      | Log <sub>10</sub> Ferritin |     | Transferrin        |      |
|-----------|--------------------|-----|------------------------|------|----------------------------|-----|--------------------|------|
|           | R <sup>2</sup> (%) | F   | R <sup>2</sup> (%)     | F    | R <sup>2</sup> (%)         | F   | R <sup>2</sup> (%) | F    |
| rs1800562 | 1.3                | 668 | 4.2                    | 2127 | 0.5                        | 256 | 2.9                | 1446 |
| rs1799945 | 0.9                | 450 | 1.4                    | 676  | 0.1                        | 53  | 0.3                | 163  |
| rs855791  | 1.6                | 806 | 1.8                    | 889  | 0.1                        | 73  | 0.1                | 47   |

SNP, indicates single nucleotide polymorphism; F, F statistic; R<sup>2</sup>, percentage of the iron marker variation explained by the SNP.

**Supplementary Table 2.** Heterogeneity test and pleiotropy test following sensitivity analysis using all SNPs associated iron status.

| <b>Exposure</b>        | <b>Method</b>             | <b>Q</b> | <b>Q_df</b> | <b>Q_pval</b> | <b>intercept</b> | <b>intercept_pval</b> |
|------------------------|---------------------------|----------|-------------|---------------|------------------|-----------------------|
| Serum iron             | MR Egger                  | 3.96     | 3           | 0.27          | 0.01             | 0.55                  |
|                        | Inverse variance weighted | 4.56     | 4           | 0.34          | NA               | NA                    |
| Ferritin               | MR Egger                  | 5.94     | 4           | 0.2           | 0                | 0.93                  |
|                        | Inverse variance weighted | 5.95     | 5           | 0.31          | NA               | NA                    |
| Transferrin            | MR Egger                  | 18.25    | 6           | 0             | 0                | 0.47                  |
|                        | Inverse variance weighted | 20.07    | 7           | 0             | NA               | NA                    |
| Transferrin saturation | MR Egger                  | 2.75     | 3           | 0.43          | 0                | 0.51                  |
|                        | Inverse variance weighted | 3.29     | 4           | 0.51          | NA               | NA                    |

df, degrees of freedom; pval, p value; NA, not applicable.

**Supplementary Table 3.** Associations of the three SNPs used in the MR main analysis with other traits at the genome-wide significance level.

| SNP       | Chr | Gene    | EA | Trait                       | Beta   | p value                | Trait                    | Beta   | p value               |
|-----------|-----|---------|----|-----------------------------|--------|------------------------|--------------------------|--------|-----------------------|
| rs1800562 | 6   | HFE     | A  | Mean corpuscular hemoglobin | 0.3    | 0                      | HbA1c                    | -0.04  | $4.7 \times 10^{-28}$ |
|           |     |         |    | Red cell distribution width | -0.192 | $7.7 \times 10^{-200}$ | Diastolic blood pressure | 0.394  | $9.0 \times 10^{-17}$ |
|           |     |         |    | Reticulocyte count          | 0.109  | $1.1 \times 10^{-63}$  | Low density lipoprotein  | -0.062 | $8.3 \times 10^{-14}$ |
|           |     |         |    | Erythrocyte indices         | NA     | $1.0 \times 10^{-46}$  | Height                   | 0.022  | $6.3 \times 10^{-12}$ |
|           |     |         |    | Pulse rate                  | 0.031  | $6.8 \times 10^{-11}$  |                          |        |                       |
| rs1799945 | 6   | HFE     | G  | Mean corpuscular hemoglobin | 0.193  | 0                      | HbA1c                    | -0.021 | $3.7 \times 10^{-19}$ |
|           |     |         |    | Red cell distribution width | -0.133 | $2.8 \times 10^{-161}$ | Blood pressure           | NA     | $2.0 \times 10^{-15}$ |
|           |     |         |    | Reticulocyte count          | 0.057  | $2.0 \times 10^{-30}$  | Platelet count           | -0.035 | $5.0 \times 10^{-12}$ |
|           |     |         |    | Hypertension                | NA     | $2.0 \times 10^{-10}$  |                          |        |                       |
| rs855791  | 22  | TMPRSS6 | G  | Mean corpuscular hemoglobin | 0.17   | 0                      | HbA1c                    | -0.017 | $3.4 \times 10^{-28}$ |
|           |     |         |    | Red cell distribution width | 0.125  | $2.8 \times 10^{-271}$ | Platelet count           | -0.032 | $2.2 \times 10^{-18}$ |
|           |     |         |    | Reticulocyte count          | 0.042  | $8.2 \times 10^{-31}$  |                          |        |                       |

SNP, single nucleotide polymorphism; MR, Mendelian randomization; Chr, indicates chromosome; EA, effect allele.

PhenoScanner V2 link is as follows: <http://www.phenoscanter.medschl.cam.ac.uk>

Related or repeated traits were counted once.

**Supplementary Table 4.** Association estimates of iron status and the risk of lung cancer after excluding rs1800562 using the inverse variance weighted analysis.

| <b>Exposure</b>        | <b>Beta</b> | <b>SE</b> | <b>OR (95% CI )</b> | <b>p value*</b> |
|------------------------|-------------|-----------|---------------------|-----------------|
| Serum Iron             | 0.19        | 0.08      | 1.21 (1.03, 1.42)   | 0.019           |
| Ferritin               | -0.58       | 0.28      | 0.56 (0.32, 0.96)   | 0.037           |
| Transferrin            | 0.34        | 0.36      | 1.40 (0.69, 2.81)   | 0.346           |
| Transferrin saturation | -0.16       | 0.08      | 0.85 (0.72, 1.00)   | 0.044           |

SE, standard error; OR: odds ratio; 95% CI, 95% confidence interval

\* p values below 0.013 (where  $p = 0.05/4$  exposures) were regarded as statistically significant.
